# Supplementary material for: Efficacy and Safety of Oral Herbal Drugs Used as Adjunctive Therapy for Melasma: A Systematic Review and Meta-Analysis of Randomised Controlled Trials
Source: Hindawi journal article supplement (doi:10.1155/2021/9628319), 2021-12-06
Supplement: f1 [file 9628319.f1.pdf]

## Supplementary Materials

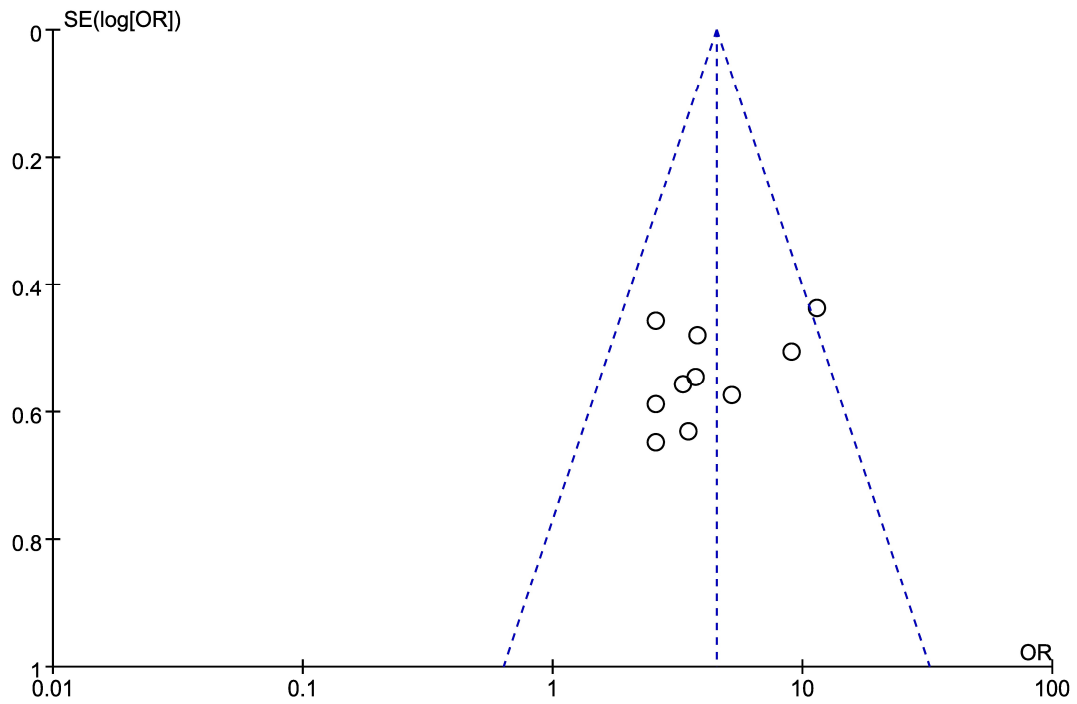

Figure S1 Funnel plot of trials reporting response rate outcome.

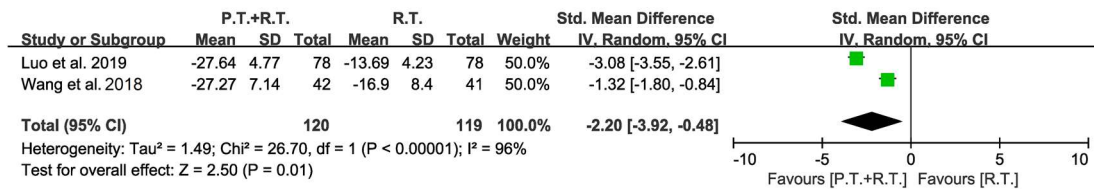

Figure S2 Forest plot of Melasma Area and Severity Index (MASI) in overall analysis.

P.T.+R.T.=phytotherapy plus routine therapy; R.T.=routine therapy.

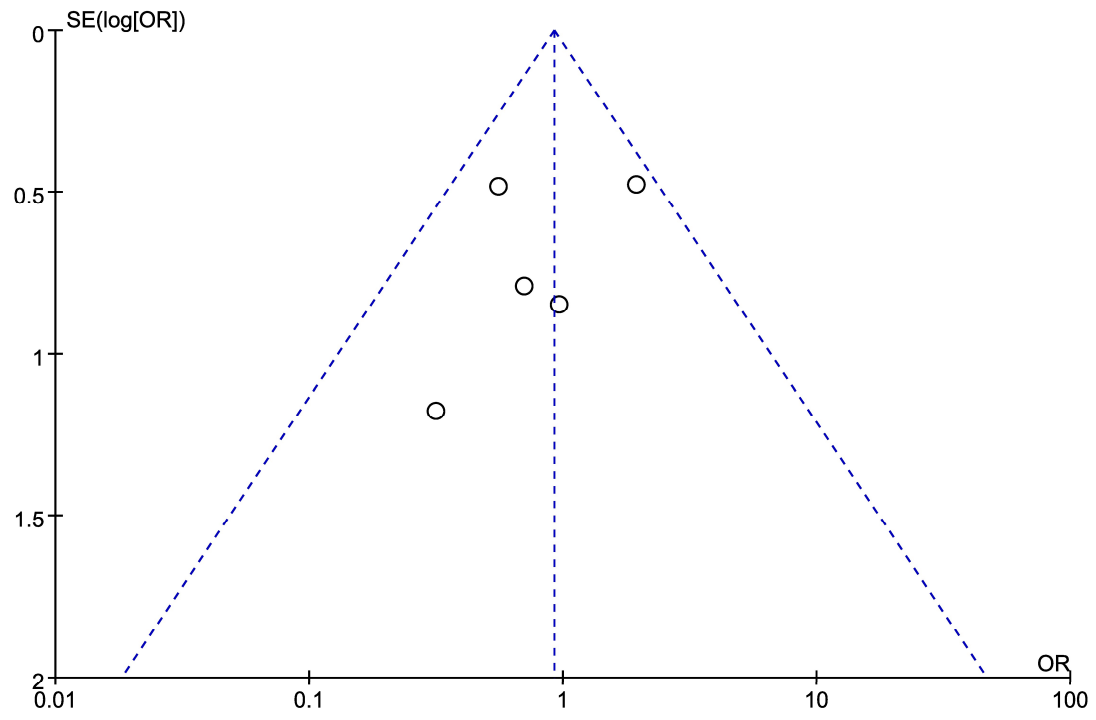

Figure S3 Funnel plot of trials reporting adverse events (AEs).
